# Supplementary material for: The Transcription Factor SsZNC1 Mediates Virulence, Sclerotial Development, and Osmotic Stress Response in Sclerotinia sclerotiorum
Source: MDPI journal article supplement (doi:10.3390/jof10020135), 2024-02-08
Supplement: s1 [file s1]

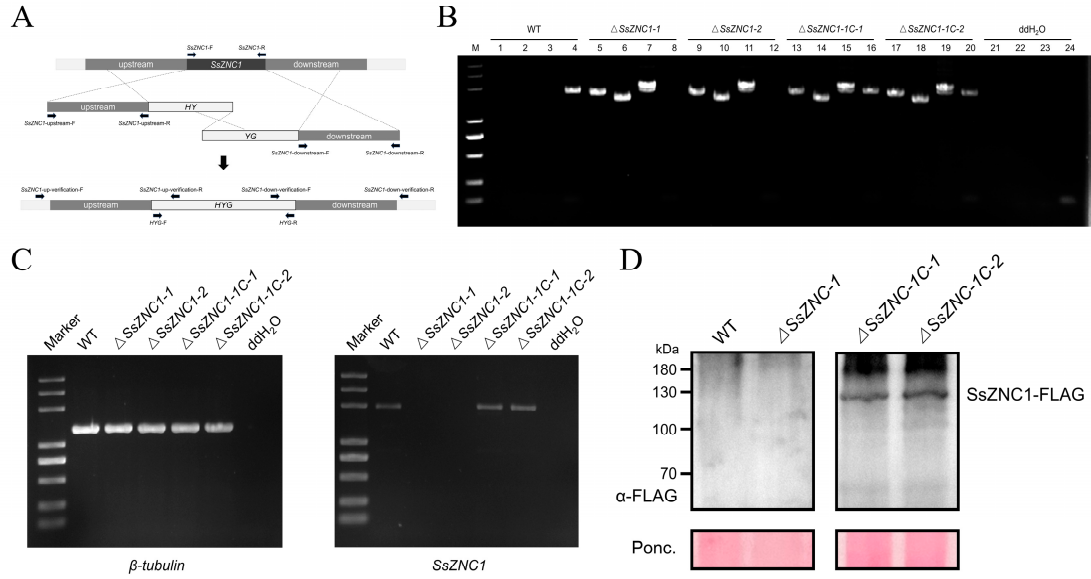

**Figure S1.** Analysis of *SsZNC1* transformants. **(A)** Schematic diagram of the *SsZNC1* gene knock-out strategy. **(B)** PCR validation of the *SsZNC1* knockout mutants and complemented strain. The verification of *SsZNC1* upstream (Lanes 1, 5, 9, 13, 17, 21); the verification of *SsZNC1* downstream (Lanes 2, 6, 10, 14, 18, and 22); the verification of *HYG* (Lanes 3, 7, 11, 15, 19, and 23); the verification of the full-length *SsZNC1* gene (Lanes 4, 8, 12, 16, 20, and 24). Lane M, DL5000 marker (3428Q, Takara, China). **(C)** RT-PCR analysis of the transcription of *SsZNC1* in different strains. The  $\beta$ -tubulin gene in *S. sclerotiorum* was used as the reference gene. Lane Marker, DL5000 marker. Primer sequences used were listed in Table S1. **(D)** Detection of protein of *SsZNC1* transformants by western blot. The protein expression of transformants through western blot using FLAG antibody (66008-4-Ig, Proteintech, China).

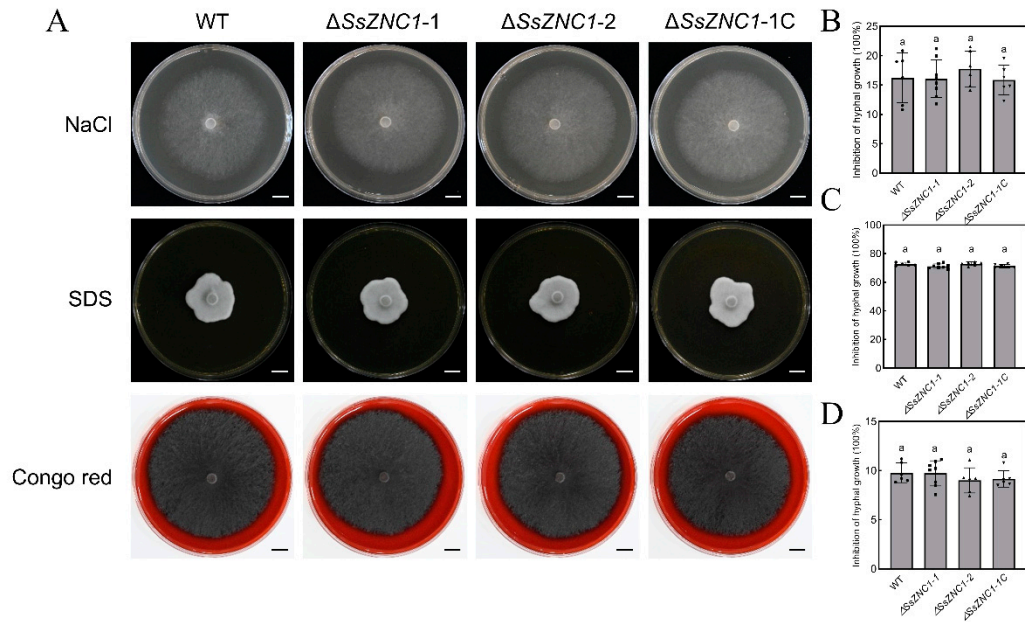

**Figure S2.** Survivability of the WT and *SsZNC1* transformants in stress media. **(A)** Growth observation of the WT and the *SsZNC1* transformants on PDA medium containing 0.5 M NaCl, 0.02% SDS, and 2.5 mg/mL Congo red. Bar, 1 cm. **(B-D)** The inhibition of hyphal growth of the WT and the *SsZNC1* transformants on PDA medium containing different stress factors. The values represent means derived from three independent replicates, and the error bars indicate  $\pm$  SD of the mean.

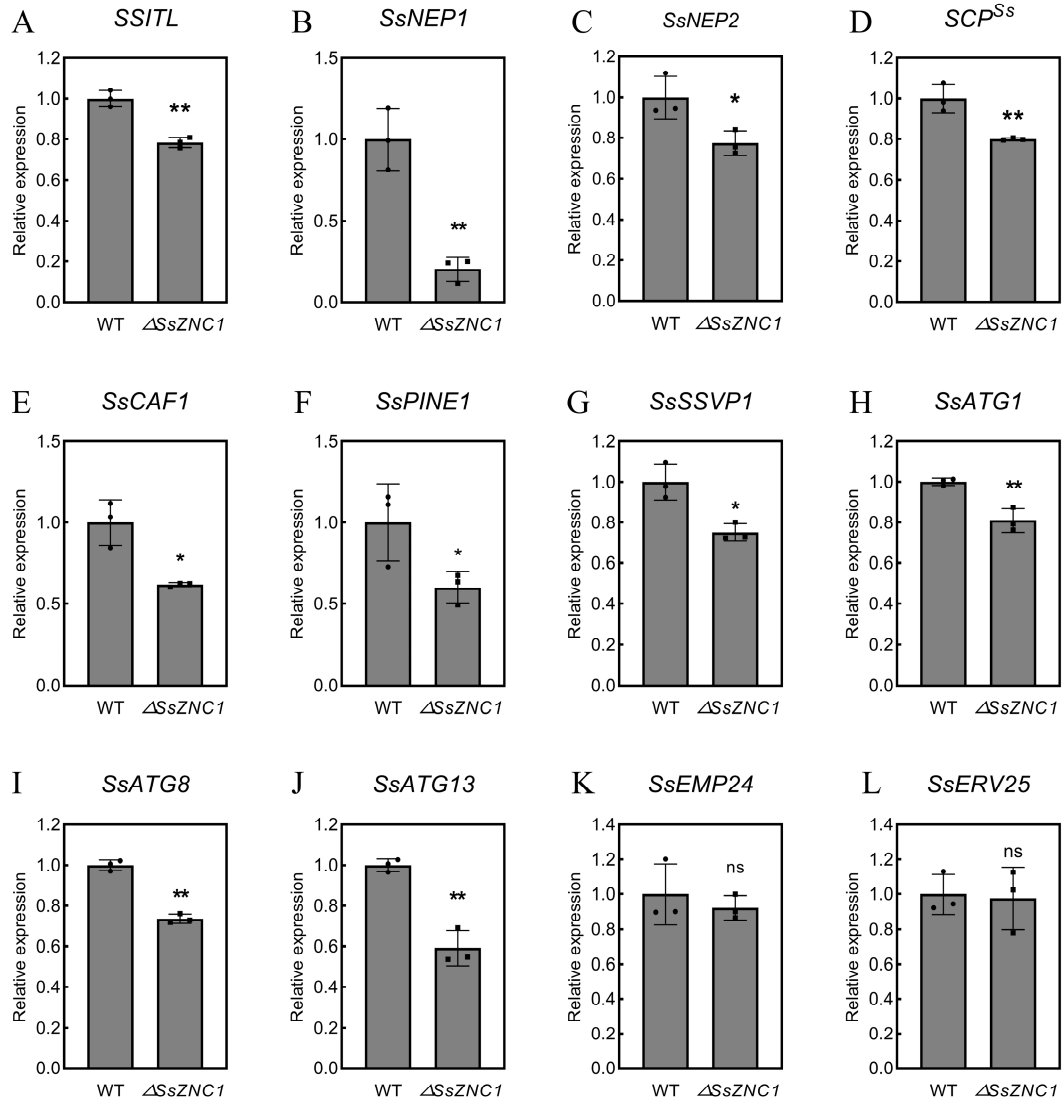

**Figure S3.** Validation of the RNA-seq data by RT-qPCR. **(A-G)** The relative expression levels of effectors were verified by RT-qPCR at 3 hpi. **(H-J)** The relative expression levels of autophagy related genes were verified by RT-qPCR at 3 hpi. **(K, L)** The relative expression levels of early secretory pathway related genes were verified by RT-qPCR at 3 hpi. The constitutively expressed  *$\beta$ -tubulin* gene was used as the reference gene to standardize data (\*,  $P < 0.05$ ; \*\*,  $P < 0.01$ ; ns, no significance).

**Table S1.** Primers used in this study.

| Name                             | Fwd Primer                 | Rvs Primer                 | Description of primers                                                                               |
|----------------------------------|----------------------------|----------------------------|------------------------------------------------------------------------------------------------------|
| <i>SsZNC1</i>                    | atgcttaactgcaagtaagtcgatgc | tcaaggggatgacctaacaggc     | Amplification of <i>SsZNC1</i> for sequencing                                                        |
| <i>SsZNC1</i> -promoter          | tggaacaacaagtgaagaac       | ctaatgagcgactgagaca        | Amplification of <i>SsZNC1</i> promoter                                                              |
| <i>HYG</i>                       | cagaagatgatattgaaggagcac   | aaagaaggattacctctaacaagtgt | Amplification of hygromycin-resistant gene                                                           |
| <i>SsZNC1</i> -upstream          | ccaaaccgaacgacaatccg       | ccggatcgacaccttggg         | Amplification of <i>SsZNC1</i> upstream                                                              |
| <i>SsZNC1</i> -downstream        | gctcgagcttgagcttgattg      | agtgagtctgccagaagagg       | Amplification of <i>SsZNC1</i> downstream                                                            |
| <i>SsZNC1</i> -up-verification   | ataaacgacgctggtcacgc       | cgccgccgctactgtacaagtg     | Amplification of the upstream of <i>SsZNC1</i> overlapped PtpC for verification of deletion mutant   |
| <i>SsZNC1</i> -down-verification | ctggaaagcaacaccgtgaact     | agactgaggaaatccgctcttgg    | Amplification of the downstream of <i>SsZNC1</i> overlapped TrpC for verification of deletion mutant |
| qPCR- <i>SsTubulin</i>           | acctccatccaagaactc         | gaactccatctcgtccat         | <i>SS1G_04652</i> ( $\beta$ - <i>Tubulin</i> ) for relative biomass                                  |
| qPCR- <i>AtUBQ10</i>             | agatccaggacaaggaaggtattc   | cgcaggaccaagtgaagagtag     | <i>AT4G05320</i> ( <i>UBQ10</i> ) for relative biomass                                               |
| qPCR- <i>SsZNC1</i>              | tggaacaacaagtgaagaac       | ctaatgagcgactgagaca        | <i>SsZNC1</i> expression assay                                                                       |
| qPCR- <i>SS1G_09143</i>          | cggattggtatcgtcagattgt     | cgttaagaagtcgtgctaatgc     | <i>SS1G_09143</i> expression assay                                                                   |
| qPCR- <i>SS1G_04923</i>          | gcggaagcgattattggtctg      | ggttgagcaggcgaaggata       | <i>SS1G_04923</i> expression assay                                                                   |
| qPCR- <i>SS1G_01229</i>          | tcggcactggagttgaacat       | agcattggagcaggtgtag        | <i>SS1G_01229</i> expression assay                                                                   |
| qPCR- <i>SS1G_11895</i>          | ctctcatctcccgtatggt        | tgattcctccgtggtatctc       | <i>SS1G_11895</i> expression assay                                                                   |
| qPCR- <i>SS1G_10071</i>          | cacatcggtcgtcaacacatt      | caggtagcagagtaatcggaga     | <i>SS1G_10071</i> expression assay                                                                   |
| qPCR- <i>SS1G_12937</i>          | gatggtggaatgctgcgaat       | ccgtggcgttggtagaatc        | <i>SS1G_12937</i> expression assay                                                                   |
| qPCR- <i>SS1G_13036</i>          | acctccacagccaactatga       | ttactagcaccgtcttctcaa      | <i>SS1G_13036</i> expression assay                                                                   |

| Name                          | Fwd Primer             | Rvs Primer             | Description of primers                   |
|-------------------------------|------------------------|------------------------|------------------------------------------|
| qPCR- <i>SSIG_02760</i>       | cctccaccatctccaccatc   | gccttcatagccgcaacac    | <i>SSIG_02760</i> expression assay       |
| qPCR- <i>SSIG_13736</i>       | ttcatcggtcgcttcagttg   | ctccagtagtcgtcggtgta   | <i>SSIG_13736</i> expression assay       |
| qPCR- <i>SSIG_00891</i>       | ctcagttcaggcagtggttac  | cggtagtagtggtgtcttcc   | <i>SSIG_00891</i> expression assay       |
| qPCR- <i>SSIG_02334</i>       | ttgctgagatggatgctgatg  | tgaccgttgatgaacttgatgt | <i>SSIG_02334</i> expression assay       |
| qPCR- <i>SSIG_14362</i>       | ggacacctgaagaataccaagt | ccatcggttacatccatatac  | <i>SSIG_14362</i> expression assay       |
| qPCR- <i>SCP<sup>Ss</sup></i> | aatctcctacgccatccaa    | cgcagcacaggtataagc     | <i>SCP<sup>Ss</sup></i> expression assay |
| qPCR- <i>SsCAF1</i>           | tggcttgtagtgattgg      | cgaagttgtctatgtgatgt   | <i>SsCAF1</i> expression assay           |
| qPCR- <i>SsITL</i>            | ctcaggaagataacggaaca   | catcaccatcatagtcatacac | <i>SsITL</i> expression assay            |
| qPCR- <i>SsNEP1</i>           | gtcaacctccataccaaca    | acagttagcatcaccgaat    | <i>SsNEP1</i> expression assay           |
| qPCR- <i>SsNEP2</i>           | cacactctatgaagcctaca   | ccattgctactgccactt     | <i>SsNEP2</i> expression assay           |
| qPCR- <i>SsPINE1</i>          | attctcgcagcatcaact     | atccgtcaactaatccatca   | <i>SsPINE1</i> expression assay          |
| qPCR- <i>SsVPI</i>            | atggcaatcctgtcaagtat   | ggtcttcttatcgcacatatac | <i>SsVPI</i> expression assay            |
| qPCR- <i>SsATG1</i>           | tcatacactaccgccattag   | taacctctccaccatcaca    | <i>SsATG1</i> expression assay           |
| qPCR- <i>SsATG13</i>          | acactccagccatacctt     | catcttctaacctgcctct    | <i>SsATG13</i> expression assay          |
| qPCR- <i>SsATG8</i>           | ggtaattcgtctatgtcatc   | ggcttcttctaaggcttca    | <i>SsATG8</i> expression assay           |
| qPCR- <i>SsEMP24</i>          | ttcacggcattgtctatgt    | cttcaccaaccagaactaac   | <i>SsEMP24</i> expression assay          |
| qPCR- <i>SsERV25</i>          | cattgtaggcgagaagagaa   | gttgtagaatacggcttggtg  | <i>SsERV25</i> expression assay          |

**Table S2.** The information of genes used for RNA-Seq analysis.

| Gene ID           | Locus tag     | Chromosomal location             | SignalP4 | TM    | Gene function description                                          |
|-------------------|---------------|----------------------------------|----------|-------|--------------------------------------------------------------------|
| <i>SSIG_01229</i> | Sscl01g010410 | Chromosome 1 (3541576..3544299)  | YES      | No TM | Glycoside hydrolase family 55 protein (FCW)                        |
| <i>SSIG_12937</i> | Sscl02g011730 | Chromosome 2 (47473..48702)      | YES      | No TM | Glycosyl hydrolase 76 (mannans degradation)                        |
| <i>SSIG_10071</i> | Sscl16g107500 | Chromosome 16 (46815..48014)     | YES      | No TM | Pectin lyase (pectin degradation)                                  |
| <i>SSIG_02760</i> | Sscl04g036990 | Chromosome 4 (1709458..1710439)  | YES      | TM    | Carbohydrate esterase family 5 protein (hemicellulose degradation) |
| <i>SSIG_09143</i> | Sscl15g107260 | Chromosome 15 (1740933..1742517) | YES      | No TM | Amidohydrolase 2                                                   |
| <i>SSIG_13736</i> | Sscl10g079780 | Chromosome 10 (1741791..1743368) | YES      | No TM | Stress response protein rds1(ferritin 2)                           |
| <i>SSIG_13036</i> | Sscl02g021570 | Chromosome 2 (3422968..3425247)  | YES      | No TM | Cu-oxidase 3                                                       |
| <i>SSIG_11895</i> | Sscl12g090620 | Chromosome 12 (1405870..1406372) | YES      | No TM | Hydrophobin class I                                                |
| <i>SSIG_04923</i> | Sscl08g062810 | Chromosome 8 (258861..260207)    | YES      | No TM | Hypothetical protein                                               |
| <i>SSIG_00891</i> | Sscl03g023660 | Chromosome 3 (604987..606652)    | NO       | No TM | Cellulose catabolic process and cellulose binding                  |
| <i>SSIG_02334</i> | Sscl04g033820 | Chromosome 4 (604987..606652)    | YES      | No TM | Cellulose catabolic process and cellulose binding                  |
| <i>SSIG_14362</i> | Sscl16g110770 | Chromosome 16(1227771..1230138)  | NO       | No TM | Methyltransferase activity                                         |
